# Supplementary material for: Discovery of Infection Associated Metabolic Markers in Human African Trypanosomiasis
Source: PubMed Central journal article supplement (PMC4624234; doi:10.1371/journal.pntd.0004200), 2015-10-27
Supplement: pntd.0004200.s002.pdf [file pntd.0004200.s002.pdf]

**S1 Table. Patient and control cohort demographic information**

|                                                  | Total Samples<br>( <i>n</i> =67) |                                    | Final Samples in NMR Data<br>( <i>n</i> = 66) |                                 | Final Subset of Samples<br>in UPLC-MS Data<br>( <i>n</i> =30) |                                 |
|--------------------------------------------------|----------------------------------|------------------------------------|-----------------------------------------------|---------------------------------|---------------------------------------------------------------|---------------------------------|
|                                                  | Controls<br>( <i>n</i> =21)      | HAT<br>Patients<br>( <i>n</i> =46) | Controls<br>( <i>n</i> =21)                   | HAT Patients<br>( <i>n</i> =45) | Controls<br>( <i>n</i> =14)                                   | HAT Patients<br>( <i>n</i> =16) |
| Age,<br>median<br>(IQR)<br>in years              | 31<br>(22-50)                    | 26<br>(17-43)                      | 31<br>(22-50)                                 | 26<br>(17-44)                   | 32<br>(24-54)                                                 | 41<br>(22-55)                   |
| Sex,<br>number of<br>males:<br>females           | 10:11                            | 19:27                              | 10:11                                         | 19:26                           | 7:7                                                           | 7:9                             |
| Diagnostic<br>Stage,<br>number of<br>early/total | N/A                              | 10/46                              | N/A                                           | 10/45                           | N/A                                                           | 3/16                            |

Abbreviations: IQR, Inter-quartile range; N/A, not applicable; There were no significant differences in age distribution or gender ratio between patient and control groups or the subsets that were analysed.
