# Supplementary material for: Discovery of Infection Associated Metabolic Markers in Human African Trypanosomiasis
Source: PubMed Central journal article supplement (PMC4624234; doi:10.1371/journal.pntd.0004200), 2015-10-27
Supplement: pntd.0004200.s003.pdf [file pntd.0004200.s003.pdf]

**S2 Table. Plasma metabolite levels measured via <sup>1</sup>H NMR spectroscopy**

| Metabolite                                 | Integrated Peak (multiplicity) | Average Integral in Controls (± SEM) in A.U. | Average Integral in HAT (± SEM) in A.U. | % Difference (HAT - Control) | P-value  |
|--------------------------------------------|--------------------------------|----------------------------------------------|-----------------------------------------|------------------------------|----------|
| 3-Hydroxybutyrate                          | 2.32(m)                        | 29.66 (± 0.89)                               | 32.09 (± 1.31)                          | 8.2%                         | NS       |
| Acetate                                    | 1.94(s)                        | 6.60 (± 0.38)                                | 6.71 (± 0.46)                           | 1.7%                         | NS       |
| Acetoacetate                               | 2.25(s)                        | 8.93 (± 0.72)                                | 10.85 (± 0.85)                          | 21.5%                        | NS       |
| Alanine                                    | 1.49(d)                        | 57.65 (± 2.18)                               | 46.84 (± 1.97)                          | -18.7%                       | 1.60E-03 |
| Citrate                                    | 2.68(d)                        | 24.97 (± 0.64)                               | 22.87 (± 0.43)                          | -8.4%                        | 2.01E-02 |
| Creatine                                   | 3.94(s)                        | 8.17 (± 0.38)                                | 10.24 (± 0.85)                          | 25.4%                        | NS       |
| Creatinine                                 | 4.07(s)                        | 7.26 (± 0.35)                                | 8.61 (± 0.30)                           | 18.7%                        | 1.30E-02 |
| Formate                                    | 8.47(s)                        | 1.00 (± 0.13)                                | 1.40 (± 0.08)                           | 41.0%                        | 2.13E-02 |
| Glucose                                    | 5.25(s)                        | 76.87 (± 4.92)                               | 79.49 (± 3.71)                          | 3.4%                         | NS       |
| Glutamine                                  | 2.14(m)                        | 67.08 (± 2.09)                               | 67.64 (± 1.58)                          | 0.8%                         | NS       |
| Glycerophosphocholine                      | 4.32(m)                        | 19.97 (± 1.06)                               | 18.27 (± 0.33)                          | -8.5%                        | NS       |
| Glycine                                    | 3.58(s)                        | 21.79 (± 1.34)                               | 19.20 (± 0.68)                          | -11.9%                       | NS       |
| Histidine                                  | 7.08(s)                        | 3.12 (± 0.16)                                | 2.58 (± 0.10)                           | -17.4%                       | 1.79E-02 |
| Lactate                                    | 1.34(d)                        | 531.15 (± 97.44)                             | 503.81 (± 55.89)                        | -5.1%                        | NS       |
| Lipid C=CCH <sub>2</sub> C=C               | 2.78(m)                        | 53.59 (± 2.71)                               | 36.07 (± 1.08)                          | -32.7%                       | 1.35E-05 |
| Lipid CH <sub>3</sub>                      | 0.88(m)                        | 718.89 (± 33.00)                             | 495.75 (± 13.50)                        | -31.0%                       | 8.46E-06 |
| Lipid CH <sub>2</sub> -C=C                 | 2.02(m)                        | 161.76 (± 7.13)                              | 147.48 (± 3.07)                         | -8.8%                        | NS       |
| Lipid CH <sub>2</sub> CH <sub>2</sub> CO   | 1.51(m)                        | 14.21 (± 0.39)                               | 10.63 (± 0.20)                          | -25.2%                       | 5.28E-08 |
| Lipid CH <sub>2</sub> CH <sub>2</sub> -C=C | 1.58(m)                        | 59.26 (± 7.19)                               | 74.80 (± 2.74)                          | 26.2%                        | NS       |
| Lipid CH <sub>2</sub> CO                   | 2.23(m)                        | 36.29 (± 4.35)                               | 54.84 (± 1.89)                          | 51.1%                        | 1.60E-03 |
| Lipid CH <sub>2</sub>                      | 1.28(m)                        | 992.66 (± 79.79)                             | 981.73 (± 33.16)                        | -1.1%                        | NS       |
| Lipid Cholesterol (HDL)                    | 0.68(m)                        | 6.50 (± 0.21)                                | 4.52 (± 0.15)                           | -30.4%                       | 5.28E-08 |
| Lipid Glyceryl CH                          | 5.20(m)                        | 4.53 (± 0.39)                                | 6.28 (± 0.22)                           | 38.8%                        | 1.48E-03 |
| Lipid ε-CH <sub>2</sub> lysyl (albumin)    | 2.93(m)                        | 23.85 (± 0.81)                               | 18.82 (± 0.49)                          | -21.1%                       | 2.53E-05 |
| Lipid, unsaturated CH=CH                   | 5.30(m)                        | 154.75 (± 8.53)                              | 101.50 (± 3.89)                         | -34.4%                       | 2.10E-05 |
| <i>myo</i> -Inositol                       | 4.087(t)                       | 6.98 (± 0.32)                                | 8.21 (± 0.29)                           | 17.6%                        | 1.58E-02 |
| <i>N</i> -acetyls of glycoproteins         | 2.06(m) & 2.09(m)              | 233.03 (± 4.68)                              | 270.13 (± 4.67)                         | 15.9%                        | 7.02E-06 |
| Phenylalanine                              | 7.45(t)                        | 4.92 (± 0.25)                                | 7.44 (± 0.46)                           | 51.2%                        | 4.18E-05 |
| Pyruvate                                   | 2.38(s)                        | 17.64 (± 2.05)                               | 26.99 (± 4.27)                          | 53.0%                        | NS       |
| Tyrosine                                   | 6.92(d)                        | 6.19 (± 0.38)                                | 6.87 (± 0.31)                           | 11.0%                        | NS       |
| Valine                                     | 1.05(d)                        | 21.90 (± 1.37)                               | 22.10 (± 0.79)                          | 0.9%                         | NS       |

Table lists metabolites that were identified in plasma <sup>1</sup>H NMR spectra and spectral regions used for integral calculation and Welch T-test analyses. \* % Difference calculated relative to control group average. Peaks from isoleucine, leucine and lysine were omitted as predominant peaks were superimposed by larger lipids signals. Abbreviations: A.U., arbitrary units; (d), doublet; (m), multiplet; NS, not significant; (s), singlet; SEM, standard error of the mean; (t), triplet.
