# Supplementary material for: Discovery of Infection Associated Metabolic Markers in Human African Trypanosomiasis
Source: PubMed Central journal article supplement (PMC4624234; doi:10.1371/journal.pntd.0004200), 2015-10-27
Supplement: pntd.0004200.s005.pdf [file pntd.0004200.s005.pdf]

**S4 Table. List of Discriminatory Lipid Species detected via UPLC-MS in both ionisation modes**

| Lipid Class           | Lipid Subclass | Composition (total Carbons: unsaturated bonds) | Chemical Formula | Observed Ion                  | RT (mins) | Predicted neutral mass | Measured m/z | Mass Accuracy (ppm) | P-value  | % Difference (HAT – Control) |
|-----------------------|----------------|------------------------------------------------|------------------|-------------------------------|-----------|------------------------|--------------|---------------------|----------|------------------------------|
| ESI Positive Mode     |                |                                                |                  |                               |           |                        |              |                     |          |                              |
| Sterol Lipids         | CE             | 18:2                                           | C45H76O2         | [M+NH4] <sup>+</sup>          | 15.70     | 648.585                | 666.621      | 3                   | 1.12E-04 | -53.1%                       |
| Glycero-phospholipids | LysoPC         | 16:0                                           | C24H50NO7P       | [M+H] <sup>+</sup>            | 1.23      | 495.333                | 496.340      | 1                   | 1.93E-05 | -58.6%                       |
| Glycero-phospholipids | LysoPC         | 18:1                                           | C26H52NO7P       | [M+H] <sup>+</sup>            | 1.29      | 521.348                | 522.355      | 0                   | 1.98E-05 | -66.5%                       |
| Glycero-phospholipids | LysoPC         | 18:0                                           | C26H54NO7P       | [M+H] <sup>+</sup>            | 1.70      | 523.364                | 524.372      | 1                   | 1.11E-04 | -72.6%                       |
| Glycero-phospholipids | LysoPC         | 18:2                                           | C26H50NO7P       | [M+H] <sup>+</sup>            | 1.05      | 519.333                | 520.338      | 3                   | 3.28E-04 | -80.5%                       |
| Glycero-phospholipids | LysoPC         | 20:3                                           | C28H52NO7P       | [M+H] <sup>+</sup>            | 1.55      | 545.348                | 546.355      | 0                   | 5.97E-05 | -75.0%                       |
| Glycero-phospholipids | LysoPC         | 20:4                                           | C28H50NO7P       | [M+H] <sup>+</sup>            | 1.03      | 543.333                | 544.340      | 0                   | 4.36E-06 | -75.6%                       |
| Glycero-phospholipids | PC             | 32:0                                           | C40H80NO8P       | [M+H] <sup>+</sup>            | 7.69      | 733.562                | 734.572      | 3                   | 2.49E-05 | 104.2%                       |
| Glycero-phospholipids | PC             | 32:0                                           | C40H80NO8P       | [M+Na] <sup>+</sup>           | 7.70      | 733.562                | 756.555      | 1                   | 3.68E-06 | 135.2%                       |
| Glycero-phospholipids | PC             | O-34:1/<br>P-34:0                              | C42H84NO7P       | [M+H] <sup>+</sup>            | 9.32      | 745.599                | 746.607      | 1                   | 3.93E-04 | 86.2%                        |
| Glycero-phospholipids | PC             | O-34:3<br>/P-34:2                              | C42H80NO7P       | [M+H] <sup>+</sup>            | 7.24      | 741.567                | 742.576      | 1                   | 8.43E-04 | -52.8%                       |
| Glycero-phospholipids | PC             | 36:3                                           | C44H82NO8P       | [M+H] <sup>+</sup><br>isotope | 6.89      | 783.578                | 785.591      | 1                   | 6.56E-03 | -33.9%                       |
| Glycero-phospholipids | PC             | 38:3                                           | C46H86NO8P       | [M+H] <sup>+</sup><br>isotope | 9.16      | 811.609                | 813.622      | 5                   | 1.93E-03 | -43.0%                       |
| Glycero-phospholipids | PC             | 38:5                                           | C46H82NO8P       | [M+H] <sup>+</sup>            | 6.24      | 807.578                | 808.587      | 2                   | 1.71E-02 | -40.9%                       |
| Glycero-phospholipids | PC             | 38:6                                           | C46H80NO8P       | [M+H] <sup>+</sup>            | 6.15      | 805.562                | 806.573      | 4                   | 1.63E-02 | -33.3%                       |
| Glycero-              | PC             | 40:4                                           | C48H88NO8P       | [M+H] <sup>+</sup>            | 9.95      | 837.625                | 838.635      | 3                   | 3.25E-03 | -47.9%                       |

|                       |        |                   |             |                       |       |         |         |   |          |        |
|-----------------------|--------|-------------------|-------------|-----------------------|-------|---------|---------|---|----------|--------|
| phospholipids         |        |                   |             |                       |       |         |         |   |          |        |
| Glycero-phospholipids | PC     | 40:5              | C48H86NO8P  | [M+H] <sup>+</sup>    | 8.22  | 835.609 | 836.619 | 3 | 1.13E-02 | -39.2% |
| Glycero-phospholipids | PC     | 40:6              | C48H84NO8P  | [M+H] <sup>+</sup>    | 7.53  | 833.594 | 834.603 | 2 | 2.94E-02 | -32.7% |
| Sphingolipids         | SM     | d34:1             | C39H79N2O6P | [M+H] <sup>+</sup>    | 5.52  | 702.568 | 703.576 | 1 | 1.75E-02 | 96.1%  |
| Sphingolipids         | SM     | 40:1              | C45H91N2O6P | [M+H] <sup>+</sup>    | 12.90 | 786.662 | 787.672 | 4 | 1.01E-03 | -43.9% |
| Sphingolipids         | SM     | d41:1             | C46H93N2O6P | [M+H] <sup>+</sup>    | 13.22 | 800.677 | 801.687 | 3 | 1.06E-03 | -58.6% |
| Glycerolipids         | TG     | 51:2              | C54H100O6   | [M+NH4] <sup>+</sup>  | 15.73 | 844.752 | 862.791 | 6 | 6.52E-05 | 98.0%  |
| Glycerolipids         | TG     | 52:3              | C55H100O6   | [M+NH4] <sup>+</sup>  | 15.60 | 856.752 | 874.791 | 5 | 4.40E-03 | 45.4%  |
| Glycerolipids         | TG     | 53:2              | C56H104O6   | [M+NH4] <sup>+</sup>  | 15.99 | 872.783 | 890.821 | 4 | 6.73E-04 | 86.1%  |
| Glycerolipids         | TG     | 53:3              | C56H102O6   | [M+NH4] <sup>+</sup>  | 15.74 | 870.768 | 888.806 | 5 | 4.02E-04 | 77.5%  |
| Glycerolipids         | TG     | 54:2              | C57H106O6   | [M+NH4] <sup>+</sup>  | 16.13 | 886.799 | 904.835 | 2 | 3.74E-04 | 70.3%  |
| Glycerolipids         | TG     | 54:5              | C57H100O6   | [M+NH4] <sup>+</sup>  | 15.51 | 880.752 | 898.789 | 3 | 2.20E-03 | 68.2%  |
| ESI Negative Mode     |        |                   |             |                       |       |         |         |   |          |        |
| Sphingolipids         | Cer    | d42:2             | C42H81NO3   | [M+FA-H] <sup>-</sup> | 13.62 | 647.622 | 692.618 | 2 | 2.51E-03 | 54.3%  |
| Glycero-phospholipids | LysoPC | 16:0              | C24H50NO7P  | [M+FA-H] <sup>-</sup> | 1.23  | 495.333 | 540.329 | 1 | 5.42E-04 | -60.1% |
| Glycero-phospholipids | LysoPC | 18:0              | C26H54NO7P  | [M+FA-H] <sup>-</sup> | 1.70  | 523.364 | 568.360 | 3 | 4.42E-03 | -69.5% |
| Glycero-phospholipids | LysoPC | 18:1              | C26H52NO7P  | [M+FA-H] <sup>-</sup> | 1.30  | 521.348 | 566.344 | 4 | 1.00E-04 | -62.5% |
| Glycero-phospholipids | LysoPC | 18:2              | C26H50NO7P  | [M+FA-H] <sup>-</sup> | 1.05  | 519.333 | 564.330 | 1 | 3.18E-04 | -78.2% |
| Glycero-phospholipids | LysoPC | 20:3              | C28H52NO7P  | [M+FA-H] <sup>-</sup> | 1.14  | 545.348 | 590.346 | 0 | 7.00E-04 | -77.9% |
| Glycero-phospholipids | LysoPC | 20:4              | C28H50NO7P  | [M+FA-H] <sup>-</sup> | 1.01  | 543.333 | 588.331 | 0 | 2.62E-04 | -73.1% |
| Glycero-phospholipids | PC     | 32:0              | C40H80NO8P  | [M+FA-H] <sup>-</sup> | 7.70  | 733.562 | 778.560 | 0 | 2.58E-03 | 111.7% |
| Glycero-phospholipids | PC     | 32:1              | C40H78NO8P  | [M+FA-H] <sup>-</sup> | 6.04  | 731.547 | 776.545 | 0 | 1.29E-04 | 62.5%  |
| Glycero-phospholipids | PC     | O-34:1/<br>P-34:0 | C42H84NO7P  | [M+FA-H] <sup>-</sup> | 9.31  | 745.599 | 790.599 | 2 | 2.00E-03 | 84.3%  |
| Glycero-phospholipids | PC     | 34:1              | C42H82NO8P  | [M+FA-H] <sup>-</sup> | 7.94  | 759.578 | 804.578 | 2 | 8.21E-03 | 35.1%  |
| Glycero-              | PC     | 34:2              | C43H82NO10P | [M+FA-H] <sup>-</sup> | 6.42  | 757.562 | 803.568 | 0 | 1.29E-04 | 40.2%  |

| phospholipids         |    |       |             | isotope   |       |         |         |   |          |        |
|-----------------------|----|-------|-------------|-----------|-------|---------|---------|---|----------|--------|
| Glycero-phospholipids | PC | 38:3  | C46H86NO8P  | [M+FA-H]- | 9.13  | 811.609 | 856.607 | 0 | 2.51E-03 | -30.7% |
| Glycero-phospholipids | PC | 38:5  | C46H82NO8P  | [M+FA-H]- | 6.27  | 807.578 | 852.576 | 0 | 1.29E-04 | -28.8% |
| Glycero-phospholipids | PE | 36:2  | C41H78NO8P  | [M-H]-    | 9.16  | 743.547 | 742.541 | 2 | 2.51E-03 | 54.4%  |
| Glycero-phospholipids | PS | 39:3  | C45H82NO10P | [M+FA-H]- | 7.94  | 827.568 | 872.567 | 1 | 4.42E-03 | 37.5%  |
| Sphingolipids         | SM | d38:1 | C43H87N2O6P | [M+FA-H]- | 10.15 | 758.630 | 803.630 | 2 | 3.46E-03 | -37.6% |
| Sphingolipids         | SM | d39:1 | C44H89N2O6P | [M+FA-H]- | 11.70 | 772.646 | 817.645 | 1 | 4.42E-03 | -52.1% |
| Sphingolipids         | SM | d40:1 | C45H91N2O6P | [M+FA-H]- | 12.90 | 786.662 | 831.661 | 1 | 3.46E-03 | -48.6% |
| Sphingolipids         | SM | d40:2 | C45H89N2O6P | [M+FA-H]- | 10.59 | 784.646 | 829.646 | 2 | 2.58E-03 | -60.2% |
| Sphingolipids         | SM | d41:1 | C46H93N2O6P | [M+FA-H]- | 13.22 | 800.677 | 845.675 | 0 | 2.00E-03 | -48.2% |
| Sphingolipids         | SM | d41:2 | C46H91N2O6P | [M+FA-H]- | 12.16 | 798.662 | 843.661 | 1 | 4.42E-03 | -55.3% |
| Sphingolipids         | SM | d42:1 | C47H95N2O6P | [M+FA-H]- | 13.49 | 814.693 | 859.689 | 2 | 3.92E-04 | -52.5% |

Molecular species that were either not detected or not significantly different in a particular electro-spray ionisation (ESI) mode were omitted from the table. Abbreviations: Cer, ceramide; CE, cholesterol ester; LysoPC, lysophosphatidylcholine; LysoPE, lysophosphatidylethanolamine; PC, phosphatidylcholine; PE, phosphatidylethanolamine; PS, phosphatidylserine; RT, retention time; SM, sphingomyelin.
