# Supplementary material for: Discovery of Infection Associated Metabolic Markers in Human African Trypanosomiasis
Source: PubMed Central journal article supplement (PMC4624234; doi:10.1371/journal.pntd.0004200), 2015-10-27
Supplement: pntd.0004200.s006.pdf [file pntd.0004200.s006.pdf]

**S5 Table. Confusion matrices of HAT vs. control classification ability of UPLC-MS discriminatory markers**

|                        | Using all 37 Discriminatory Markers       |                                           | Using Top 5 Discriminatory Markers        |                                           |
|------------------------|-------------------------------------------|-------------------------------------------|-------------------------------------------|-------------------------------------------|
|                        | Actual HAT Patients                       | Actual Controls                           | Actual HAT Patients                       | Actual Controls                           |
| Predicted HAT Patients | 15 (TP)                                   | 2 (FP)                                    | 15 (TP)                                   | 2 (FP)                                    |
| Predicted Controls     | 1 (FN)                                    | 12 (TN)                                   | 1 (FN)                                    | 12 (TN)                                   |
|                        | Sensitivity =<br>$TP/[TP+FN] =$<br>93.75% | Specificity =<br>$TN/[TN+FP] =$<br>85.71% | Sensitivity =<br>$TP/[TP+FN] =$<br>93.75% | Specificity =<br>$TN/[TN+FP] =$<br>85.71% |
| Upper 95% CI           | 100%*                                     | 100%*                                     | 100%*                                     | 100%*                                     |
| Lower 95% CI           | 81.89%                                    | 67.38%                                    | 81.89%                                    | 67.38%                                    |

Classification based on O-PLS-DA models (for 16 Markers:  $R^2Y$  0.780,  $Q^2Y$  0.555; for top 5 markers:  $R^2Y$  0.558,  $Q^2Y$  0.505). Abbreviations as described for S3 Table.
