# Supplementary material for: Discovery of Infection Associated Metabolic Markers in Human African Trypanosomiasis
Source: PLoS Negl Trop Dis. 2015 Oct 27;9(10):e0004200. doi: 10.1371/journal.pntd.0004200 (PMC4624234; doi:10.1371/journal.pntd.0004200)
Supplement: S3 Table — (PDF) [file pntd.0004200.s004.pdf]

**S3 Table. Confusion matrices of HAT vs. control classification ability of NMR discriminatory markers**

|                        | Using all 16 Discriminatory Markers     |                                         | Using Top 5 Discriminatory Markers      |                                         |
|------------------------|-----------------------------------------|-----------------------------------------|-----------------------------------------|-----------------------------------------|
|                        | Actual HAT Patients                     | Actual Controls                         | Actual HAT Patients                     | Actual Controls                         |
| Predicted HAT Patients | 40 (TP)                                 | 1 (FP)                                  | 38 (TP)                                 | 1 (FP)                                  |
| Predicted Controls     | 5 (FN)                                  | 20 (TN)                                 | 7 (FN)                                  | 20 (TN)                                 |
|                        | Sensitivity =<br>TP/[TP+FN] =<br>88.89% | Specificity =<br>TN/[TN+FP] =<br>95.24% | Sensitivity =<br>TP/[TP+FN] =<br>84.44% | Specificity =<br>TN/[TN+FP] =<br>95.24% |
| Upper 95% CI           | 98.07%                                  | 100%*                                   | 95.03%                                  | 100%*                                   |
| Lower 95% CI           | 79.71%                                  | 86.13%                                  | 73.86%                                  | 86.13%                                  |

Classification based on O-PLS-DA models, as described in supplementary protocols in Supporting Information (for 16 Markers:  $R^2Y$  0.736,  $Q^2Y$  0.657; for top 5 markers:  $R^2Y$  0.641,  $Q^2Y$  0.582). Abbreviations: \*calculated upper CI was capped to absolute maximal value of 100%; CI, confidence interval; FN, false negatives; FP, false positives; TN, true negatives; TP, true positives.
